# Supplementary material for: mir-21 Overexpressing Mesenchymal Stem Cells Accelerate Fracture Healing in a Rat Closed Femur Fracture Model
Source: Hindawi journal article supplement (doi:10.1155/2015/412327), 2015-01-01
Supplement: f1 [file 412327.f1.pdf]

Supplementary table 1. Sequences of primers for real time PCR.

| <i>Gene name</i>                | <i>Accession number</i> | <i>Forward primer (5' to 3')</i> | <i>Reverse primer (5' to 3')</i> |
|---------------------------------|-------------------------|----------------------------------|----------------------------------|
| <i>OPN</i>                      | NM_012881.2             | TCCAAGGAGTATAAGCAGCGG<br>GCCA    | CTCTTAGGGTCTAGGACTAGC<br>TTCT    |
| <i>Runx2</i>                    | NM_001278483.1          | CCGATGGGACCGTGGTT                | CAGCAGAGGCATTTTCGTAGCT           |
| <i>Osx</i>                      | NM_181374.2             | GGAGGTTTCACTCCATTCCA             | TAGAAGGAGCAGGGGACAGA             |
| <i>ALP</i>                      | NM_013059.1             | TCCGTGGGTCGGATTCCT               | GCCGGCCCAAGAGAGAA                |
| <i><math>\beta</math>-actin</i> | NM_031144.3             | CGTAAAGACCTCTATGCCAACA           | CGGACTCATCGTACTCCTGCT            |
| <i>U6</i>                       | NR_004394               | CTCGCTTCGGCAGCACA                | AACGCTTCACGAATTTGCGT             |
| <i>miR-21</i>                   | NR_029493               | GCCTAGCTTATCAGACTGATGT<br>TGA    | Universal primer                 |
